# Supplementary material
Source: Springer Nature journal article supplement (https://www.springermedizin.de/resource/supplementary/12936_2008_718_MOESM2_ESM.pdf/9548084)

## A. 2% HAEMATOCRIT

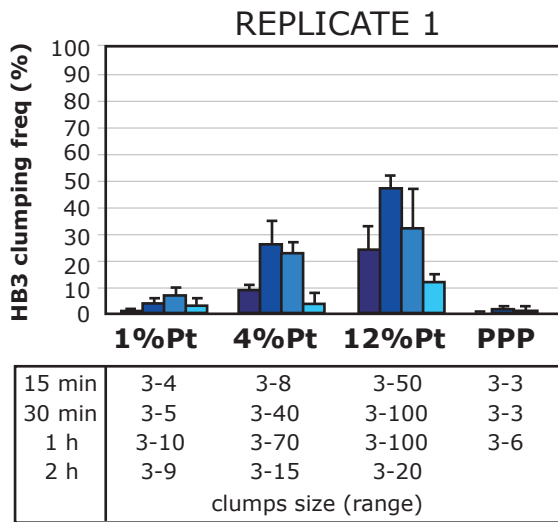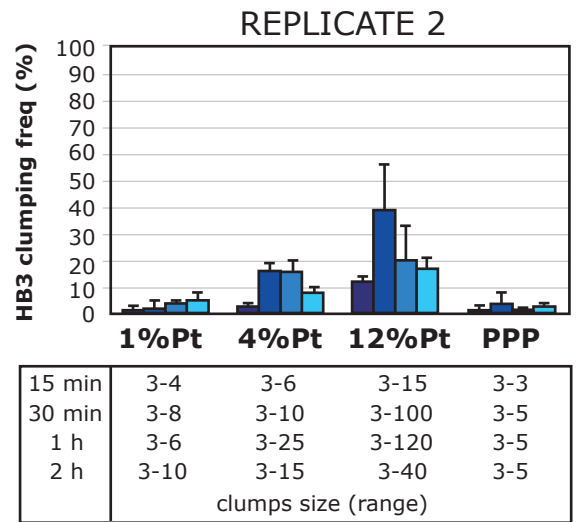

## B. 5% HAEMATOCRIT

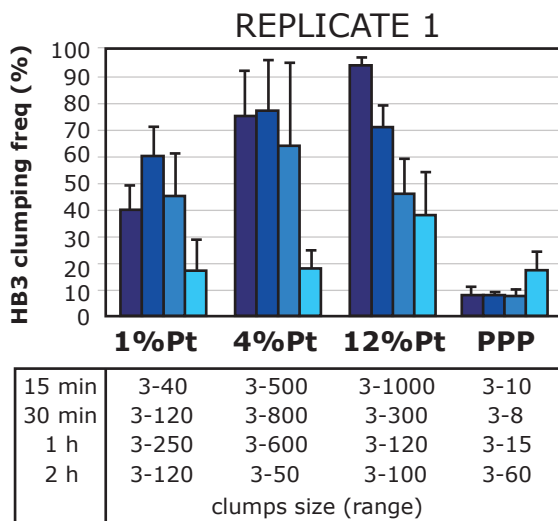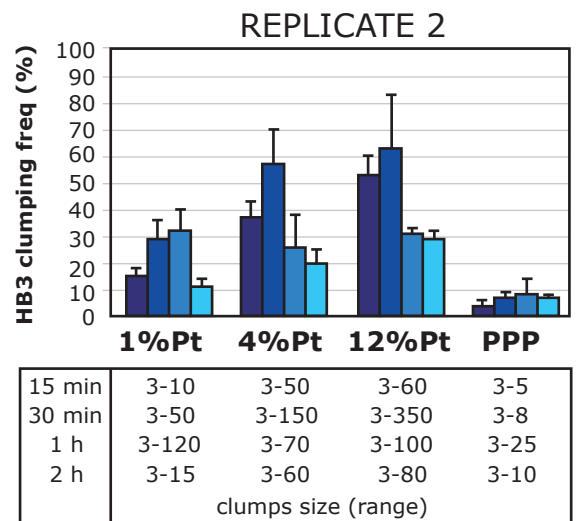

## C. 10% HAEMATOCRIT

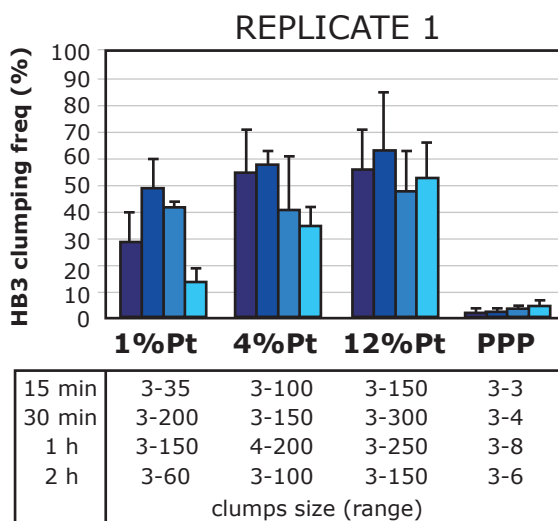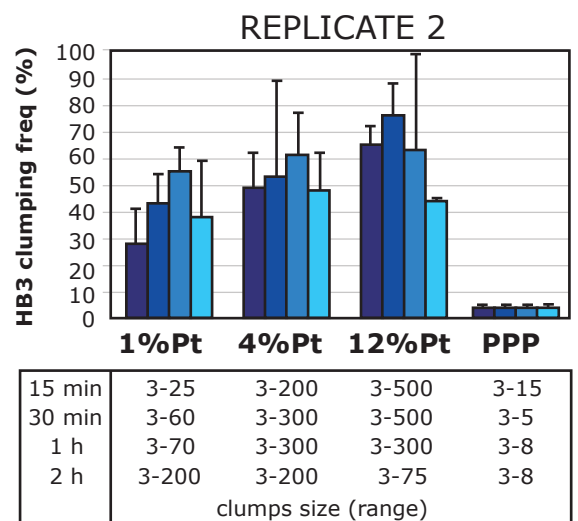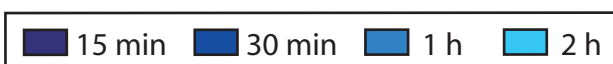

Supplement: MOESM2 [file 9548084]
